# Supplementary material
Source: PubMed Central journal article supplement (PMC11249045)
Supplement: NIHMS1946715-supplement-01.pdf [file NIHMS1946715-supplement-01.pdf]

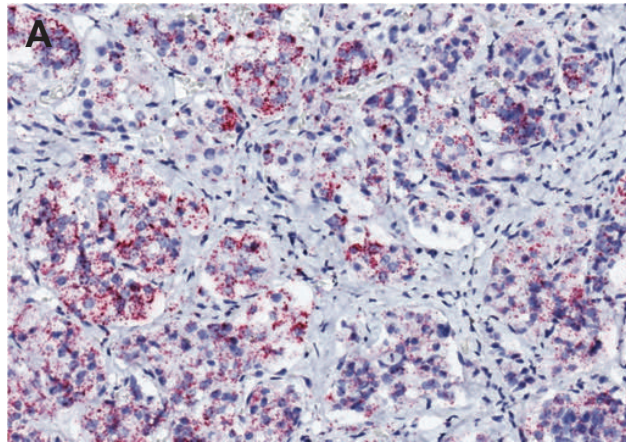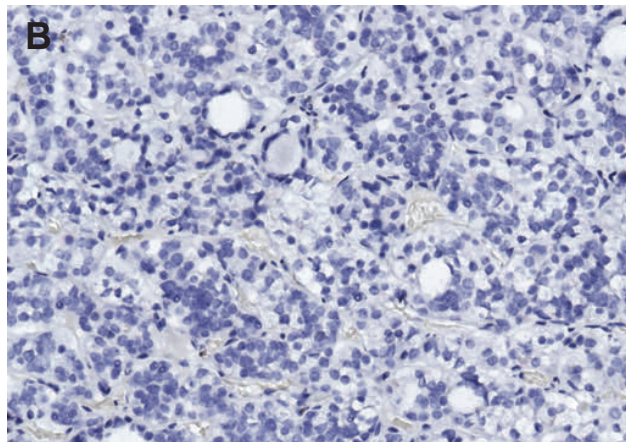

**Supplementary Figure 1**

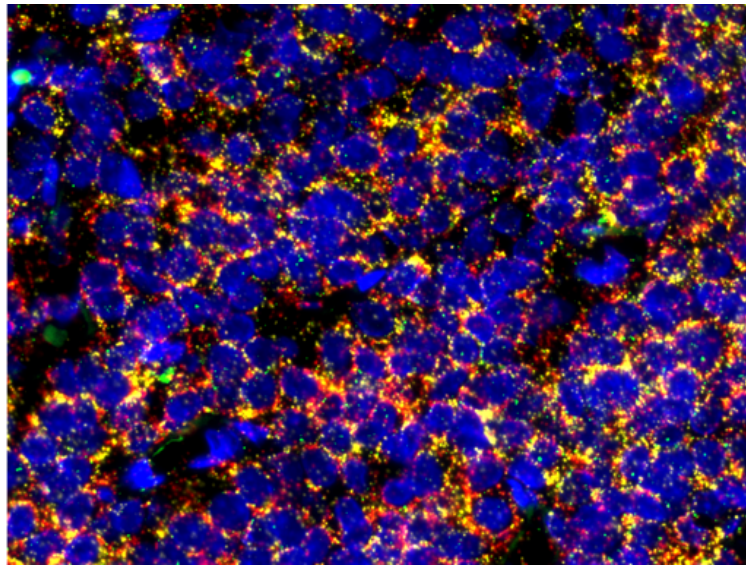

**Supplementary Figure 2**

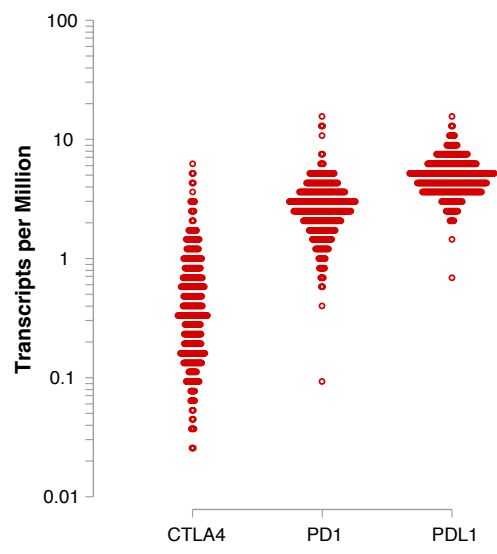

**Supplementary Figure 3**

**Supplementary Table 1. Primers**

| <b>Gene</b>    | <b>Forward primer</b>        | <b>Reverse primer</b>       | <b>Product size</b> |
|----------------|------------------------------|-----------------------------|---------------------|
| Rat PRL        | 5'-TCCCGGAGCTGTTTGACC-3'     | 5'-AGCCGCTTGTTTTGTTCCCTC-3' | 334 bp              |
| Rat GH         | 5'-ATCACTGAGTGGCGATGGCT-3'   | 5'-ATGTAGGCACGCTCGAACTCT-3' | 199 bp              |
| Rat GAPDH      | 5'-AGTGCCAGCCTCGTCTCATA-3'   | 5'-GATGGTGATGGGTTTCCCGT-3'  | 248 bp              |
| Rat CTLA4      | 5'-ACGACATTCACAGTGAAGAAC-3'  | 5'-TCACAAATGGCCTTTCAGTTG-3' | 428 bp              |
| Mouse TSH beta | 5'-GTAGTGGGTGGAGAAGAGT-3'    | 5'-CAGATGGTGGTGTGATG-3'     | 221 bp              |
| Mouse LH beta  | 5'-TGGCCGCAGAGAATGAGTT-3'    | 5'-CCAGGGAGGCGGACAGA-3'     | 166 bp              |
| Mouse POMC     | 5'-CGGGAGAGAAAAGCCGAGTCAC-3' | 5'-TTCCACGTGTCAGGCCTAGT-3'  | 199 bp              |
| Mouse CTLA-4   | 5'-GACATTCACAGAGAAGAATAC-3'  | 5'-CATGCTCCTTAGCTTTAAATT-3' | 597 bp              |
| Mouse GAPDH    | 5'-AGGTCATCCCAGAGCTGAAC-3'   | 5'-TCTCTTGCTCAGTGCCTTG-3'   | 397 bp              |

**Supplementary Table 2.** Tissue gene expression (in transcripts per million, *tpm*) for CTLA4, PD1, and PD-L1 according to the GTEx Portal database. Numbers represent the median (interquartile range). Anatomical locations with a median greater than 4 are highlighted.

| Tissue      | No.  | CTLA4 <i>tpm</i> |     | PD1 <i>tpm</i> |     | PD-L1 <i>tpm</i> |     |
|-------------|------|------------------|-----|----------------|-----|------------------|-----|
| liver       | 226  | 0.14             | 0.2 | 0.27           | 0.3 | 0.92             | 0.6 |
| ileum       | 187  | 4.93             | 19  | 4.10           | 11  | 2.65             | 0.7 |
| thyroid     | 653  | 0.76             | 1.3 | 2.21           | 1.9 | 4.68             | 2.1 |
| pituitary   | 283  | 0.36             | 0.6 | 2.75           | 1.6 | 4.81             | 2.4 |
| testis      | 361  | 2.53             | 1.0 | 0.31           | 0.2 | 1.54             | 2.1 |
| prostate    | 245  | 0.76             | 1.2 | 1.26           | 1.2 | 2.23             | 0.6 |
| ovary       | 180  | 0.19             | 0.3 | 0.38           | 0.4 | 2.20             | 1.5 |
| vagina      | 156  | 1.01             | 1.0 | 1.19           | 1.2 | 2.35             | 2.3 |
| nerve       | 619  | 0.68             | 0.8 | 0.96           | 0.8 | 2.56             | 1.4 |
| spleen      | 241  | 5.80             | 4.6 | 11.89          | 7.8 | 15.00            | 6.9 |
| cervix      | 19   | 0.74             | 0.8 | 1.05           | 1.3 | 3.38             | 2.3 |
| skin        | 1305 | 0.53             | 0.7 | 0.40           | 0.5 | 1.00             | 0.8 |
| uterus      | 151  | 0.33             | 0.5 | 0.79           | 0.7 | 3.05             | 2.7 |
| salivary    | 162  | 0.52             | 0.6 | 1.62           | 1.6 | 1.66             | 0.8 |
| brain       | 2483 | 0.11             | 0.2 | 0.10           | 0.2 | 0.96             | 1.0 |
| kidney      | 89   | 0.36             | 0.7 | 0.54           | 0.9 | 1.79             | 1.4 |
| lung        | 578  | 4.35             | 3.8 | 3.25           | 2.5 | 24.56            | 26  |
| breast      | 459  | 0.82             | 1.2 | 0.79           | 0.9 | 2.37             | 1.6 |
| colon       | 779  | 0.60             | 1.1 | 0.61           | 0.8 | 1.41             | 1.0 |
| stomach     | 539  | 0.53             | 0.7 | 1.24           | 1.2 | 1.32             | 1.1 |
| esophagus   | 1445 | 0.29             | 0.7 | 0.61           | 0.7 | 2.02             | 1.6 |
| bladder     | 21   | 0.58             | 1.5 | 1.05           | 2.4 | 1.88             | 0.9 |
| fat         | 1204 | 0.77             | 0.9 | 1.35           | 1.4 | 3.23             | 2.6 |
| pancreas    | 328  | 0.05             | 0.1 | 0.17           | 0.2 | 1.16             | 0.8 |
| adrenal     | 258  | 0.11             | 0.2 | 0.36           | 0.3 | 1.20             | 0.8 |
| blood       | 755  | 1.78             | 2.8 | 3.02           | 7.0 | 3.11             | 7.0 |
| artery      | 1335 | 0.48             | 0.7 | 0.43           | 0.8 | 2.88             | 3.0 |
| muscle      | 803  | 0.04             | 0.1 | 0.06           | 0.1 | 1.16             | 1.2 |
| heart       | 861  | 0.15             | 0.2 | 2.61           | 4.9 | 4.28             | 3.8 |
| spinal cord | 159  | 0.24             | 0.4 | 0.41           | 0.5 | 1.12             | 1.1 |

Note: The GTEx Portal, now in its 8.2 version, has compiled the gene expression from 52 different anatomical locations from a large number of post-mortem donors. Not every donor contributes a sample from each of the 52 locations because samples that are not considered normal by pathologists or yield poor quality RNA are excluded. Results are expressed as number of mRNA transcripts per million transcripts (*tpm*).
